# Supplementary material for: The Effect of Post-Graduate Year Training on the Self-Efficacy and Emotional Traits of Physicians Facing the COVID-19 Pandemic
Source: MDPI journal article supplement (doi:10.3390/healthcare9070912), 2021-07-19
Supplement: s1 [file s1]

### Part 1. Personal Information

1. Gender: ☐1. Male ☐2. Female
2. Age (years): ☐1. 21–30 ☐2. 31–40 ☐3. 41–50 ☐4.  $\geq 51$
3. Marital Status: ☐1. Single ☐2. Married
4. Seniority: ☐1. PGY ☐2. Resident ☐3. Visiting Staff (Years \_\_\_\_\_)
5. Department: ☐1. Family Medicine ☐2. Internal Medicine ☐3. Surgery  
☐4. Pediatrics ☐5. Obstetrics and Gynecology ☐6. Orthopedics  
☐7. Neurosurgery ☐8. Urology ☐9. Otolaryngology  
☐10. Ophthalmology ☐11. Dermatology ☐12. Neurology  
☐13. Psychiatry ☐14. Rehabilitation ☐15. Anesthesiology  
☐16. Radiology ☐17. Radiation Oncology  
☐18. Anatomy and Pathology ☐19. Clinical Pathology  
☐20. Nuclear Medicine ☐21. Emergency Medicine  
☐22. Occupational Medicine ☐23. Plastic Surgery
6. Working Experience: ☐1.  $< 1$  year ☐2. 1–9 years ☐3. 10–19 years  
☐4.  $\geq 20$  years
7. SARS Care Experience: ☐1. Yes ☐2. No
8. COVID-19 Care Experience: ☐1. Yes ☐2. No

### Part 2. General Self-Efficacy Scale

You faced the outbreak of the COVID-19 pandemic, where the number of confirmed cases and deaths increased sharply in Taiwan and other countries. Choose the appropriate self-assessment that describes the situation when you were taking care of COVID-19-diagnosed patients during the period. Please tick (V) the suitable box.

| No. | Questions                                                              | Totally Wrong | Kind of Correct | Nearly Correct | Totally Correct |
|-----|------------------------------------------------------------------------|---------------|-----------------|----------------|-----------------|
| 1   | If I try my best, I can always solve the problem.                      |               |                 |                |                 |
| 2   | Even if others oppose me, I can still get what I want.                 |               |                 |                |                 |
| 3   | It is easy for me to stick to my ideals and achieve my goals.          |               |                 |                |                 |
| 4   | I am confident that I can deal with any sudden situations effectively. |               |                 |                |                 |
| 5   | I can deal with unexpected situations                                  |               |                 |                |                 |

|    |                                                                                  |  |  |  |  |
|----|----------------------------------------------------------------------------------|--|--|--|--|
|    | with my talents.                                                                 |  |  |  |  |
| 6  | Most problems will be able to be solved if I make the necessary efforts.         |  |  |  |  |
| 7  | I can face difficulties calmly because I trust my ability to deal with problems. |  |  |  |  |
| 8  | I can usually find several solutions when facing a difficult problem.            |  |  |  |  |
| 9  | I can usually think of some ways to solve problems when in trouble.              |  |  |  |  |
| 10 | I can handle it easily no matter what happens.                                   |  |  |  |  |

Questionnaire reference: Schwarzer (1993), revised in 1997.

### Part 3. The Emotional Trait and State Scale

You faced the outbreak of the COVID-19 pandemic, where the number of confirmed cases and deaths increased sharply in Taiwan and other countries. Choose the appropriate self-assessment that describes the situation during this period. Please tick (V) the suitable box.

| No. | Questions                                             | Completely unsuitable | Nearly unsuitable | Nearly suitable | Completely suitable |
|-----|-------------------------------------------------------|-----------------------|-------------------|-----------------|---------------------|
| 1   | I am often feel surprised.                            |                       |                   |                 |                     |
| 2   | I am often satisfied with my own life.                |                       |                   |                 |                     |
| 3   | I often feel panic.                                   |                       |                   |                 |                     |
| 4   | I am often interested in people and things around me. |                       |                   |                 |                     |
| 5   | I often feel disgusted with things around me.         |                       |                   |                 |                     |

| No. | Questions                                         | Completely unsuitable | Nearly unsuitable | Nearly suitable | Completely suitable |
|-----|---------------------------------------------------|-----------------------|-------------------|-----------------|---------------------|
| 6   | I often feel calm and relaxed.                    |                       |                   |                 |                     |
| 7   | I am often in a bad mood.                         |                       |                   |                 |                     |
| 8   | I often feel delightful.                          |                       |                   |                 |                     |
| 9   | I often feel like crying.                         |                       |                   |                 |                     |
| 10  | I often think the world is beautiful.             |                       |                   |                 |                     |
| 11  | I often feel disappointed.                        |                       |                   |                 |                     |
| 12  | I often feel that life is full of fun.            |                       |                   |                 |                     |
| 13  | I often feel angry.                               |                       |                   |                 |                     |
| 14  | I often feel glorious.                            |                       |                   |                 |                     |
| 15  | I often feel confident.                           |                       |                   |                 |                     |
| 16  | I often feel guilty.                              |                       |                   |                 |                     |
| 17  | I often feel lonely.                              |                       |                   |                 |                     |
| 18  | I often feel that I am lucky.                     |                       |                   |                 |                     |
| 19  | I often feel like others care about and trust me. |                       |                   |                 |                     |
| 20  | I often feel happy.                               |                       |                   |                 |                     |
| 21  | I often feel that my life is miserable.           |                       |                   |                 |                     |
| 22  | I often feel a lack of energy.                    |                       |                   |                 |                     |
| 23  | I often feel wronged.                             |                       |                   |                 |                     |
| 24  | I often feel scared.                              |                       |                   |                 |                     |
| 25  | I often feel ashamed.                             |                       |                   |                 |                     |
| 26  | I often feel that life is full of hope.           |                       |                   |                 |                     |
| 27  | I often feel anxious.                             |                       |                   |                 |                     |
| 28  | I often feel a sense of accomplishment.           |                       |                   |                 |                     |

#### Part 4. Feedback and Suggestions

- What ability do you have to take care of patients during the COVID-19 pandemic?

---

---

---

- To be competent in caring for patients with COVID-19, what kinds of skill (including knowledge, attitudes, and values) do you need to have beside the current training system?

---

---

---

- To deal with emerging infectious diseases, what courses should be added to the PGY training courses?

---

---

---
